# Supplementary material for: The Impact of Resource Allocation on the Machine Learning Lifecycle
Source: Springer Nature journal article supplement (doi:10.1007/s12599-023-00842-7), 2023-11-14
Supplement: 12599_2023_842_MOESM1_ESM.pdf [file 12599_2023_842_MOESM1_ESM.pdf]

# **The Impact of Resource Allocation on the Machine Learning Lifecycle**

## **Bridging the Gap between Software Engineering and Management**

**Sebastian Duda, Peter Hofmann, Nils Urbach, Fabiane Völter, Amelie Zwickel**

Business & Information Systems Engineering (2023)

**Appendix (available online via <http://link.springer.com>)**

# Appendix A

Table 4. Concept Matrix of the Literature Analysis

|                                    | Data Storage Infrastructure | Training Infrastructure | Deployment Infrastructure | Security Mechanisms | Raw Data | Pre-processed Data | Production Data | Hardware Evaluation Tools | Data Management Tools | Data pre-processing Tools | Feature Engineering Tools | Model Management Tools | Application/User Interface | Pre-Trained ML Model | Configured ML Model | Trained ML Model | Serviced ML Model |
|------------------------------------|-----------------------------|-------------------------|---------------------------|---------------------|----------|--------------------|-----------------|---------------------------|-----------------------|---------------------------|---------------------------|------------------------|----------------------------|----------------------|---------------------|------------------|-------------------|
| Aboueata et al. (2019)             |                             |                         |                           |                     |          |                    |                 |                           |                       |                           | *                         |                        |                            |                      |                     |                  |                   |
| Abubakar et al. (2020)             |                             |                         |                           |                     |          | x                  |                 |                           | x                     | x                         |                           |                        |                            |                      |                     |                  |                   |
| Agrawal et al. (2019)              | x                           | x                       |                           |                     | x        | x                  |                 |                           | x                     | x                         | *                         |                        |                            |                      |                     |                  |                   |
| Amershi et al. (2019)              |                             |                         |                           |                     | x        |                    |                 |                           | x                     |                           |                           |                        | x                          | x                    | x                   |                  |                   |
| Arpteg et al. (2018)               | x                           | x                       |                           | x                   | x        | x                  | x               | x                         |                       |                           |                           | x                      |                            | x                    | x                   | x                |                   |
| Baier and Seebacher (2019)         |                             | x                       | x                         |                     |          | x                  | x               |                           | x                     | x                         |                           | x                      |                            |                      | x                   |                  | x                 |
| Balayn et al. (2021)               |                             |                         |                           |                     |          | x                  |                 |                           | x                     | x                         | *                         |                        | x                          |                      |                     | x                | x                 |
| Belani et al. (2019)               |                             |                         |                           |                     | x        | x                  |                 |                           |                       |                           |                           |                        |                            |                      |                     | x                |                   |
| Bhattacharjee et al. (2017)        |                             | x                       | x                         | x                   |          | x                  |                 |                           |                       | x                         |                           | x                      | x                          |                      |                     | x                |                   |
| Boag et al. (2018)                 |                             | x                       | x                         |                     |          |                    |                 | x                         |                       |                           |                           |                        |                            |                      |                     | x                |                   |
| Duong and Sang (2018)              |                             | x                       |                           |                     |          |                    |                 | x                         |                       |                           |                           |                        |                            |                      |                     | x                |                   |
| Fujii et al. (2020)                |                             |                         |                           |                     |          |                    |                 |                           | x                     |                           |                           |                        |                            |                      |                     | x                |                   |
| Giray (2021)                       |                             |                         | x                         |                     | x        | x                  |                 |                           | x                     | x                         | *                         |                        |                            |                      |                     |                  |                   |
| Haakman et al. (2021)              |                             | x                       | x                         |                     | x        | x                  | x               | x                         | x                     | x                         | x                         | x                      |                            |                      |                     | x                | x                 |
| Hesenius et al. (2019)             |                             |                         |                           |                     | x        |                    |                 |                           | x                     |                           | *                         | *                      |                            |                      | x                   |                  |                   |
| Hill et al. (2016)                 |                             |                         |                           |                     |          |                    |                 |                           |                       |                           | x                         |                        |                            |                      |                     |                  |                   |
| Hutchinson et al. (2021)           |                             |                         |                           |                     |          |                    |                 | x                         | x                     |                           |                           |                        |                            |                      |                     |                  |                   |
| Idowu et al. (2021)                |                             | x                       |                           |                     |          |                    |                 | x                         | x                     |                           |                           | x                      | x                          |                      | x                   | x                |                   |
| Javadi et al. (2020)               | x                           | x                       | x                         |                     | x        | x                  |                 |                           |                       |                           |                           |                        |                            |                      |                     | x                |                   |
| John et al. (2020)                 |                             | x                       |                           |                     | x        | x                  |                 |                           |                       |                           |                           |                        |                            |                      |                     | x                | x                 |
| Jöhnk et al. (2021)                | x                           | x                       | x                         |                     |          |                    | x               |                           |                       |                           |                           |                        |                            |                      |                     | x                |                   |
| Hazelwood et al. (2018)            |                             | x                       | x                         |                     |          | x                  |                 | x                         |                       | x                         | x                         |                        |                            |                      |                     | x                |                   |
| Kumeno (2020)                      |                             | x                       | x                         | x                   |          | x                  |                 |                           | x                     | x                         | x                         | x                      | x                          |                      |                     | x                | x                 |
| Lins et al. (2021)                 |                             |                         |                           | x                   | x        |                    |                 |                           |                       | x                         | x                         | x                      |                            |                      |                     | x                | x                 |
| Lwakatare et al. (2020)            |                             |                         |                           |                     | x        |                    | x               |                           |                       | x                         | x                         | x                      |                            | x                    |                     | x                |                   |
| Mikalef et al. (2019)              | x                           |                         |                           |                     |          |                    |                 |                           |                       |                           |                           |                        |                            |                      |                     |                  |                   |
| Mikalef and Gupta (2021)           | x                           | x                       |                           |                     | x        | x                  | x               | x                         |                       |                           |                           |                        |                            |                      |                     |                  |                   |
| Nascimento et al. (2019)           |                             |                         |                           |                     | x        | x                  |                 |                           |                       |                           | x                         | x                      |                            |                      | x                   | x                |                   |
| Nguyen et al. (2019)               |                             | x                       |                           |                     |          |                    |                 | x                         |                       | x                         | x                         | x                      |                            | x                    | x                   |                  |                   |
| Papagiannidis et al. (2021)        |                             |                         | x                         |                     |          | x                  | x               |                           |                       |                           |                           |                        |                            |                      |                     | x                |                   |
| Philipp et al. (2020)              |                             |                         |                           | x                   | x        | x                  |                 |                           | x                     | x                         | x                         |                        | x                          | x                    |                     | x                | x                 |
| Polyzotis et al. (2018)            |                             |                         | x                         |                     | x        |                    | x               |                           | x                     | x                         | x                         |                        |                            |                      |                     |                  |                   |
| Reimann and Kniesel-Wünsche (2020) |                             |                         |                           |                     |          | x                  |                 |                           |                       | x                         | x                         | x                      |                            |                      | x                   | x                |                   |
| Ribeiro et al. (2015)              |                             |                         |                           |                     | x        |                    |                 |                           |                       | x                         |                           | x                      | x                          |                      | x                   | x                | x                 |
| Saldamli et al. (2021)             |                             |                         | x                         |                     |          |                    |                 |                           |                       |                           |                           | x                      | x                          | x                    | x                   |                  | x                 |
| Schmidt et al. (2020)              |                             | x                       | x                         |                     |          | x                  |                 |                           |                       |                           | x                         |                        |                            |                      |                     | x                |                   |
| Sculley et al. (2015)              |                             |                         |                           |                     | x        | x                  |                 |                           | x                     |                           |                           | x                      |                            |                      | x                   |                  |                   |
| Someh et al. (2020)                |                             |                         |                           |                     | x        | x                  | x               |                           | x                     | x                         |                           |                        |                            |                      |                     |                  |                   |
| Wamba-Taguimdje et al. (2020)      |                             |                         | x                         |                     | x        |                    |                 |                           |                       |                           |                           | x                      |                            |                      |                     |                  |                   |
| Washizaki et al. (2019)            |                             |                         |                           |                     | x        |                    |                 |                           |                       |                           | x                         | x                      | x                          |                      |                     | x                | x                 |
| Whang and Lee (2020)               | x                           |                         |                           |                     | x        | x                  |                 |                           | x                     | x                         |                           |                        |                            | x                    |                     |                  |                   |
| Yao et al. (2017)                  |                             |                         |                           |                     |          |                    |                 |                           |                       | x                         | x                         |                        | x                          |                      | x                   |                  | x                 |
| Yi et al. (2020)                   | x                           | x                       | x                         |                     |          | x                  |                 |                           |                       |                           |                           |                        |                            |                      |                     | x                | x                 |
| Yu et al. (2020)                   |                             | x                       | x                         | x                   |          |                    |                 |                           |                       |                           |                           |                        |                            |                      | x                   |                  |                   |

## Appendix B

Table 5: Design Iterations of Framework

| Phase       | Empirical basis     | Iteration description                                                                                                                                                                                                                                                                                                                                                                                                                                                                                                                                                                                                                                                                                                                                                                                                                                                                                                                                                                                                                         | dopted framework structures                                                                                                                                               | Evaluation Method          | Fulfilled evaluation criteria (Sonnenberg and vom Brocke 2012)                                                                             | Unfulfilled evaluation criteria (Sonnenberg and vom Brocke 2012)                                                                                                 |
|-------------|---------------------|-----------------------------------------------------------------------------------------------------------------------------------------------------------------------------------------------------------------------------------------------------------------------------------------------------------------------------------------------------------------------------------------------------------------------------------------------------------------------------------------------------------------------------------------------------------------------------------------------------------------------------------------------------------------------------------------------------------------------------------------------------------------------------------------------------------------------------------------------------------------------------------------------------------------------------------------------------------------------------------------------------------------------------------------------|---------------------------------------------------------------------------------------------------------------------------------------------------------------------------|----------------------------|--------------------------------------------------------------------------------------------------------------------------------------------|------------------------------------------------------------------------------------------------------------------------------------------------------------------|
| Iteration 1 | Literature          | Initial framework design on the basis of resources and influencing factors mentioned in the literature. Broad categorization of resources into: <ul style="list-style-type: none"> <li>• Data</li> <li>• Infrastructure/hardware</li> <li>• Technical implementation</li> <li>• Residual category</li> </ul>                                                                                                                                                                                                                                                                                                                                                                                                                                                                                                                                                                                                                                                                                                                                  | Vertical structuring of resources as proposed by Lins et al. (2021)                                                                                                       | Criteria-based evaluation  |                                                                                                                                            | <ul style="list-style-type: none"> <li>• Understandability</li> <li>• Internal consistency</li> <li>• Completeness</li> <li>• Varying level of detail</li> </ul> |
| Iteration 2 |                     | Mapping of resources according to the ML lifecycle as proposed by Ashmore et al. (2021) and Amershi et al. (2019)<br>Introduction of effect classes (indirect and direct) as well as effect types (supplementing, iterating, reusing, automating, informing, creating)                                                                                                                                                                                                                                                                                                                                                                                                                                                                                                                                                                                                                                                                                                                                                                        | Vertical structuring of resources as proposed by Lins et al. (2021)<br>Horizontal structuring of resources as proposed by Ashmore et al. (2021) and Amershi et al. (2019) | Criteria-based evaluation  | <ul style="list-style-type: none"> <li>• Internal consistency</li> </ul>                                                                   | <ul style="list-style-type: none"> <li>• Understandability</li> <li>• Completeness</li> <li>• Varying level of detail</li> </ul>                                 |
| Iteration 3 | Interviews (E1- E6) | <p>Revision of the demarcation of resources:</p> <ul style="list-style-type: none"> <li>• Addition of Breeding Ground (humans' technical and business skills and glue/reusable code)</li> <li>• Specification of infrastructure in data, training, and deployment</li> </ul> <p>Rearrangement of resources:</p> <ul style="list-style-type: none"> <li>• Specification of Model Managing Tools in: ML Training Tools, Experiment Tracking Tools, Model Lineage Tools, and Model Monitoring Tools</li> <li>• Changes of layers in services to reflect the kind of resources: <ul style="list-style-type: none"> <li>○ ML Software in Software Services</li> <li>○ Developing Tooling in Developer Services</li> <li>○ Infrastructure in Infrastructure Services</li> </ul> </li> <li>• Change of Serviced ML Model in Deployed ML Models</li> <li>• Integration of security mechanisms around any resources rather than representation as single resource</li> </ul> <p>Specification of relationships in process and effect relationships</p> | Horizontal structuring of resources as proposed by Ashmore et al. (2021) and Amershi et al. (2019)                                                                        | Interview-based evaluation | <ul style="list-style-type: none"> <li>• Internal consistency</li> <li>• Robustness</li> <li>• Fidelity with real-world problem</li> </ul> | <ul style="list-style-type: none"> <li>• Understandability</li> <li>• Too little level of detail</li> <li>• Completeness</li> </ul>                              |

|                |                         |                                                                                                                                                                                                                                                                                                                                                                                                                                                                                                                                                    |                                                                                                    |                            |                                                                                                                                                                                                                            |                                                                                               |
|----------------|-------------------------|----------------------------------------------------------------------------------------------------------------------------------------------------------------------------------------------------------------------------------------------------------------------------------------------------------------------------------------------------------------------------------------------------------------------------------------------------------------------------------------------------------------------------------------------------|----------------------------------------------------------------------------------------------------|----------------------------|----------------------------------------------------------------------------------------------------------------------------------------------------------------------------------------------------------------------------|-----------------------------------------------------------------------------------------------|
| Iteration<br>4 | Interviews<br>(E7- E8)  | <p>Revision of vertical arrangement of the resources as well as simplification of the framework: Elimination of layers to increase preciseness of framework while adding data, training, and deployment infrastructure as base layers</p> <p>Specification of primary and secondary resources<br/>Introduction of missing resources:</p> <ul style="list-style-type: none"> <li>• Data repositories</li> <li>• Data generation tools</li> <li>• ML Training Tools</li> <li>• ML Models' Outputs</li> <li>• Data Quality-Enhancing Tools</li> </ul> | Horizontal structuring of resources as proposed by Ashmore et al. (2021) and Amershi et al. (2019) | Interview-based evaluation | <ul style="list-style-type: none"> <li>• Internal consistency</li> <li>• Robustness</li> <li>• Fidelity with real-world problem</li> <li>• Level of detail</li> </ul>                                                      | <ul style="list-style-type: none"> <li>• Understandability</li> <li>• Completeness</li> </ul> |
| Iteration<br>5 | Interviews<br>(E9- E11) | <p>Addition of human resources (data engineer, data scientist, software developer /-architect, product-/ process owner) and business (strategy and business requirements)</p> <p>Extradition of Glue / Reusable Code in a base layer</p>                                                                                                                                                                                                                                                                                                           | Horizontal structuring of resources as proposed by Ashmore et al. (2021) and Amershi et al. (2019) | Interview-based evaluation | <ul style="list-style-type: none"> <li>• Internal consistency</li> <li>• Robustness</li> <li>• Fidelity with real-world problem</li> <li>• Level of detail</li> <li>• Understandability</li> <li>• Completeness</li> </ul> |                                                                                               |
